# Supplementary material for: Supramolecular control of heme binding and electronic states in multi-heme peptide assemblies
Source: Royal Society of Chemistry journal article supplement (doi:10.1039/c7ob01081h), 2017-01-01
Supplement: c7ob01081h1.pdf [file c7ob01081h1.pdf]

## Supplementary Information

### Supramolecular control of heme binding and electronic states in multi-heme peptide assemblies

H. Christopher Fry, Anna R. Wood, and Lee A. Solomon

#### Materials and Methods

##### Peptide Design and Visualization

The peptides were designed rationally with the aid of Hyperchem and Pymol. The peptide molecules were built in Hyperchem assuming a parallel  $\beta$ -sheet conformation. A 'sandwich' structure was created consisting of 2 pentamers (five peptides of PA-(LK)<sub>3</sub> or PA-(KL)<sub>3</sub>) in an idealized  $\beta$ -sheet arrangement ( $\sim 5$  Å) with the hydrophobic leucine side facing the interior of the sandwich structure. A decamer of PA-L<sub>3</sub>K<sub>3</sub> was created as an idealized  $\beta$ -sheet but no sandwich structure was created due to the block patterning of the leucine and lysine residues as opposed to the hydrophilic/hydrophobic patterning of the leucine and lysine residues in PA-(LK)<sub>3</sub> and PA-(KL)<sub>3</sub>. The structures were partially minimized using the CHARMM27 force field to achieve idealized  $\beta$ -sheet arrays. Heme molecules were also built in hyperchem and incorporated into the structures by forcing an axial ligation to the  $\epsilon$ -nitrogen of the histidine residue. This structure was partially minimized using the CHARMM27 force field. The resulting structures were imported into PYMOL and modified for visualization.

##### Peptide Synthesis, purification and characterization

The synthetic procedure for c16-AHL<sub>3</sub>K<sub>3</sub>-CO<sub>2</sub>H has been reported in our previous studies. The synthesis of c16-AHLK<sub>3</sub>-CONH<sub>2</sub>, and c16-AHK<sub>3</sub>LKL-CONH<sub>2</sub>, cleavage from the resin and RP-HPLC purification followed the same strategy as the previously reported peptide with the exception of using rink amide – MBHA resin in place of Wang resin. The first amino acid was double coupled to the RA-MBHA resin to ensure an efficient reaction. MALDI-TOF MS (Bruker UltrafleXtreme MALDI-TOF) was used to identify the peptides; c16-AHL<sub>3</sub>K<sub>3</sub>-CONH<sub>2</sub>: Calc'd for C<sub>61</sub>H<sub>114</sub>N<sub>14</sub>O<sub>9</sub> + [H<sup>+</sup>], 1187.9, found 1188.117 m/z; c16-AH(LK)<sub>3</sub>-CONH<sub>2</sub>: Calc'd for C<sub>61</sub>H<sub>114</sub>N<sub>14</sub>O<sub>9</sub> + [H<sup>+</sup>], 1187.9, found 1188.238 m/z, and c16-AH(LK)<sub>3</sub>-CONH<sub>2</sub>: Calc'd for C<sub>61</sub>H<sub>114</sub>N<sub>14</sub>O<sub>9</sub> + [H<sup>+</sup>], 1187.9, found 1188.457 m/z.

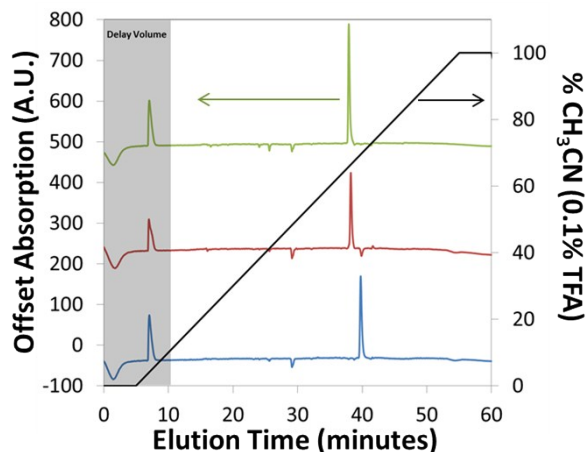

**Figure S1.** Reversed Phase HPLC chromatograms of PA-L<sub>3</sub>K<sub>3</sub> (blue), PA-(LK)<sub>3</sub> (red), and PA-(KL)<sub>3</sub> (green). 100  $\mu$ M peptide was dissolved in the mobile phase, water (0.1% trifluoroacetic acid). After injection, a gradient of 2% acetonitrile (0.1% trifluoroacetic acid) per minute over 50 minutes was employed. >98% purity was achieved. The signals in the delay volume are systematic responses from running consecutive samples (negative peak) and injection (positive peak at  $\sim$ 7 min).

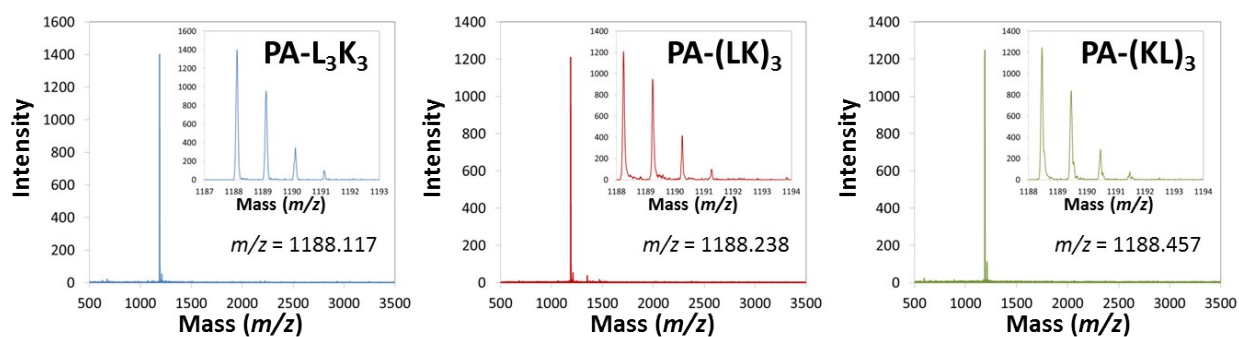

**Figure S2.** MALDI-TOF Mass Spectrometry of the peptide series. 2', 6' Dihydroxyacetophenone (1 wt%) in 50:50 Water:Acetonitrile (0.1% TFA) was used as the matrix.

## Stock Solution Preparation

All stock solutions were used the day of preparation. Each peptide, c16-AHL<sub>3</sub>K<sub>3</sub>-CO<sub>2</sub>H, c16-AH(LK)<sub>3</sub>-CONH<sub>2</sub>, and c16-AH(KL)<sub>3</sub>-CONH<sub>2</sub> (3-4 mg) was dissolved in nanopure water (Millipore A10) to obtain a 1 wt%, 8.4 mM solution. Hemin (Porcine, Sigma-Aldrich) was dissolved in DMSO (Sigma Aldrich) to achieve a 10 mM stock solution. Note: Hemin/DMSO stock solutions were always made to ensure that the final DMSO concentration in the sample was less than 1% (v/v).

## Peptide Secondary Structure Characterization

In order to analyze secondary structural formation in the absence of heme, circular dichroism spectroscopy (Jasco, Inc. J-815) was employed to analyze the typical n- $\pi^*$  transitions found for a  $\beta$ -sheet assembly. Assembled stock solutions were prepared by adding 54  $\mu$ L of the peptide stock into 246  $\mu$ L of 50 mM HEPES buffer, 100 mM NaCl, pH 7.0 or 20 mM NH<sub>4</sub>OH, pH, 10.5 solutions to yield a 1.5 mM stock solution. The samples were heated to 70 °C and then cooled. These stock solutions were then diluted into water, 10  $\mu$ L into 290  $\mu$ L to afford a 50  $\mu$ M solution. The samples were transferred to a 1 mm quartz cuvette (Starna Cells, Inc.) and analyzed by scanning from 260 – 190 nm.

Additional secondary structural characterization was achieved with infrared spectroscopy (Thermo Scientific, Nicolet 6700 FT-IR spectrophotometer). 10  $\mu$ L of the 1.5 mM samples described in the previous section were dropcast onto a 32 mm CaF<sub>2</sub> plate (Sigma Aldrich) and were air dried. The thin films were aligned in the spectrophotometer and the amide I vibrations in the region from 1500 – 1800 cm<sup>-1</sup> were analyzed.

## Heme Coordination Characterization

Heme was introduced to the 1.5 mM peptide solutions described in the previous section by adding 3  $\mu$ L of the 10 mM heme stock solution into the 300  $\mu$ L peptide solution to yield 1.5 mM peptide, 100  $\mu$ M heme or 15:1 - peptide:heme samples. The samples were then heated to 70 °C and cooled to room temperature.

For UV/visible spectroscopic analysis, the samples were transferred to a 1 mm quartz cuvette (Starna Cells, Inc.) and analyzed from 300 – 800 nm. Due to the size of some of the assemblies we observe some light scattering as evidenced by an increase in the baseline absorption. As a result, we correct for the sample scattering by subtracting the absorption value at 800 nm. These same samples were analyzed by CD spectroscopy by scanning the Soret region from 350 – 500 nm. The secondary structure of the heme coordinated assemblies were analyzed by IR spectroscopy only because the addition of DMSO UV cutoff precludes measurement in the 190 – 260 nm range required for CD measurements. Samples for IR were prepared in the same fashion described earlier when heme is no coordinated to the assembly.

X-band continuous wave EPR experiments were carried out using a Bruker ELEXSYS E580 spectrometer operating in the X-band (9.4 GHz) and equipped with an Oxford CF935 helium flow cryostat with an ITC-5025 temperature controller. Samples for EPR (same preparation as described in the 'Sample Preparation' section) were concentrated to 1 mM hemin and 15 mM Peptide with a 10,000 molecular

weight cutoff spin diafiltration system (EMD Millipore Inc., Amicon Ultra-0.5 Centrifugal Filter Unit with Ultracel-10 membrane). All experiments were performed at 10 K with modulation amplitude set to 10 and power set to 10 mW.

Electrochemistry measurements were made with a BASI Electrochemical Workstation. Samples (10 mL of a 1.5 mM peptide 100  $\mu$ M heme solution) were dropcast and dried on a freshly polished glassy carbon working electrode. A platinum wire served as the auxiliary electrode while a Ag/AgCl reference electrode was used. The measurements were made in 50 mM phosphate buffer, 150 mM NaCl, at pH 7.5. All numbers reported in the text are vs. Ag/AgCl.

### Supramolecular Morphology Characterization

Atomic force microscopy (AFM) images were obtained with a Veeco MultiMode 8 scanning probe microscope equipped with a silicon nitride tips (Bruker, SCANASYST Air) for imaging soft-materials. The images were obtained using the instruments peak force mode. The sample was prepared by drop casting 100  $\mu$ L of a 15  $\mu$ M (peptide) sample (diluted from a 150  $\mu$ M solution with or without 10  $\mu$ M heme) on freshly cleaved mica (Ted Pella) and allowed to incubate for 5 minutes. The excess sample was wicked away with filter paper and washed 3 x with water. The sample was air dried prior to measurements.

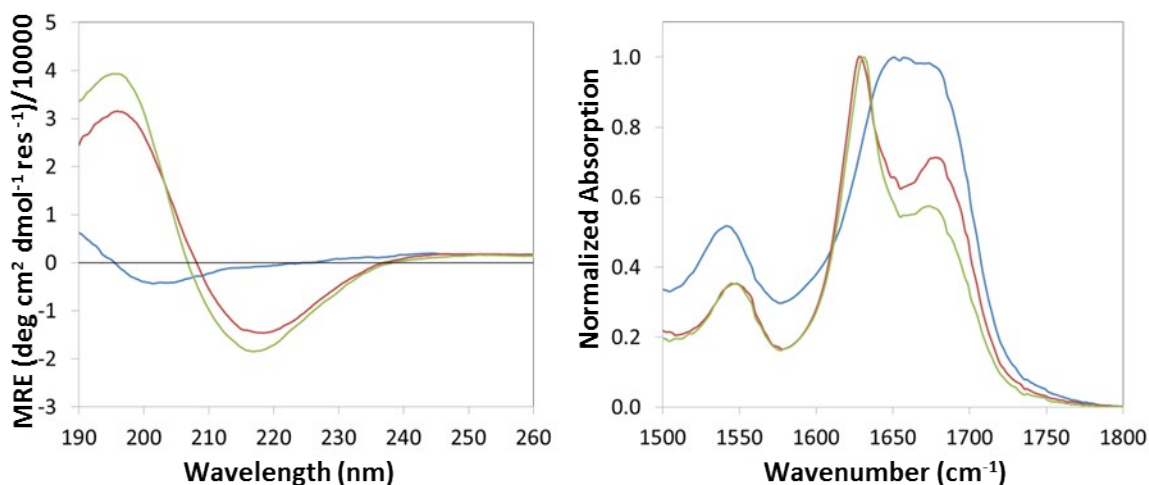

**Figure S3.** Characterization of the secondary structure of the peptide assemblies without heme in 50 mM HEPES Buffer, 100 mM NaCl, pH 7.0 by (A) CD and (B) FTIR spectroscopies. PA-L<sub>3</sub>K<sub>3</sub> (Blue), PA-(LK)<sub>3</sub> (red), and PA-(KL)<sub>3</sub> (green).

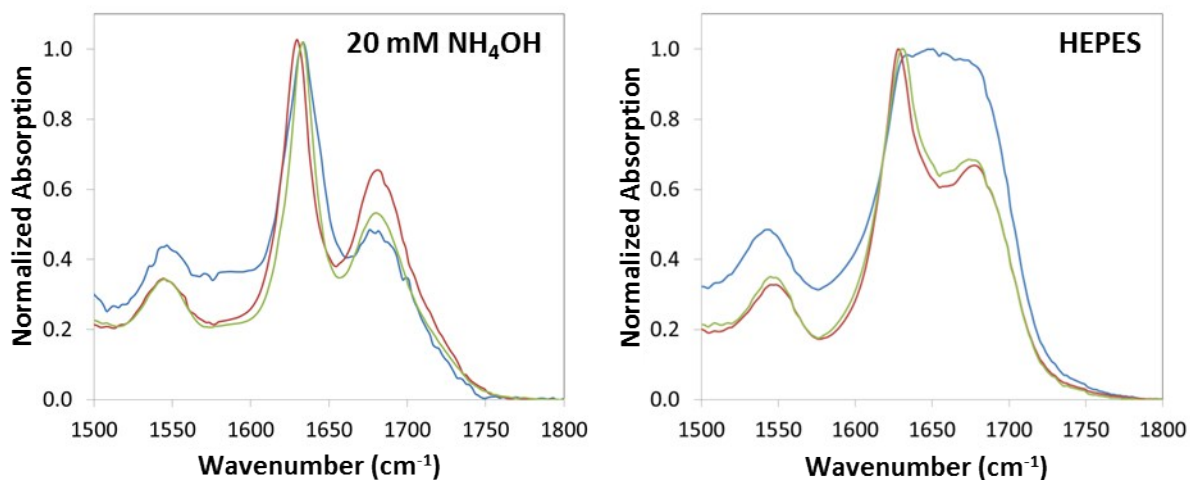

**Figure S4.** Characterization of the secondary structure of the peptide assemblies **with heme** in (A) 20 mM NH<sub>4</sub>OH and (B) 50 mM HEPES Buffer, 100 mM NaCl, pH 7.0 by FTIR spectroscopy. PA-L<sub>3</sub>K<sub>3</sub> (Blue), PA-(LK)<sub>3</sub> (red), and PA-(KL)<sub>3</sub> (green). Samples (10 μL) of 15:1 peptide:heme (1.5 mM peptide, 100 μM heme) were dropcast and air dried on a transparent CaF<sub>2</sub> window.

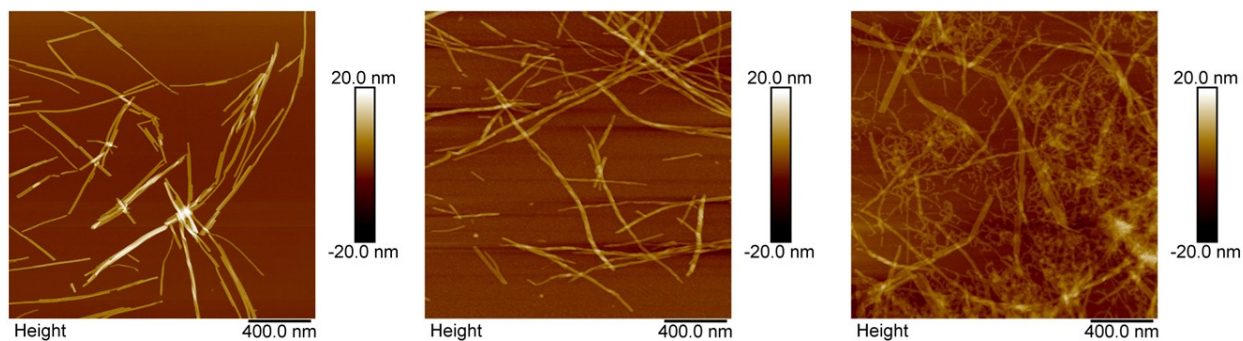

**Figure S5.** Atomic force micrographs characterizing the supramolecular structure of (A) PA-L<sub>3</sub>K<sub>3</sub> (B) PA-(LK)<sub>3</sub> and (C) PA-(KL)<sub>3</sub> in the absence of heme. The samples were dropcast onto freshly cleaved mica from a solution of 15 μM peptide sample in 20 mM NH<sub>4</sub>OH.

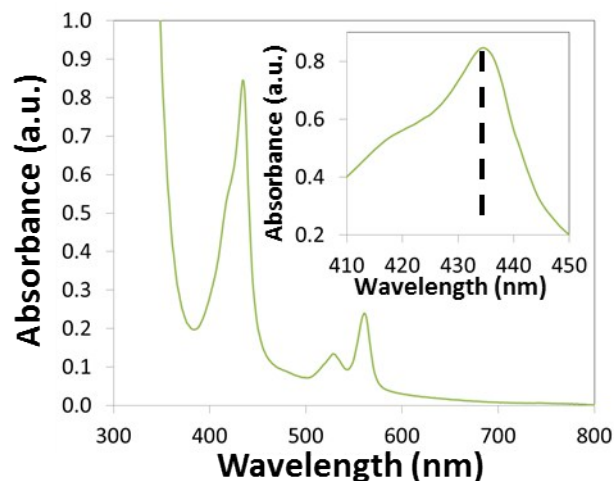

**Figure S6.** UV/visible spectrum of reduced hemin coordinated to PA-(KL)<sub>3</sub> in 20 mM NH<sub>4</sub>OH. The inset is a detailed close-up to confirm that the reduced, ferrous heme yields a 435 nm Soret band that is distinct from the oxidized, ferric state and that the split Soret is maintained.

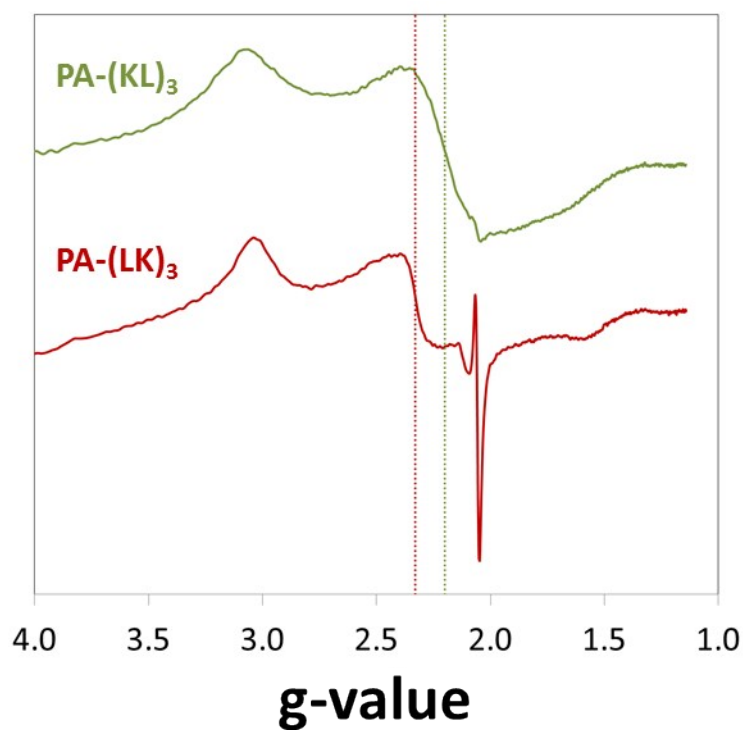

**Figure S7.** A magnified view of figure 4B in which the low spin characteristics of PA-(KL)<sub>3</sub> and PA-(LK)<sub>3</sub> are highlighted. The vertical lines highlight the difference in the  $g_y$  values, 2.33 for PA-(LK)<sub>3</sub> (red dashed line) and 2.20 for PA-(KL)<sub>3</sub> (green dashed line). The broadening due to spin-spin interactions between neighbouring heme molecules in PA-(KL)<sub>3</sub> is highlighted here.

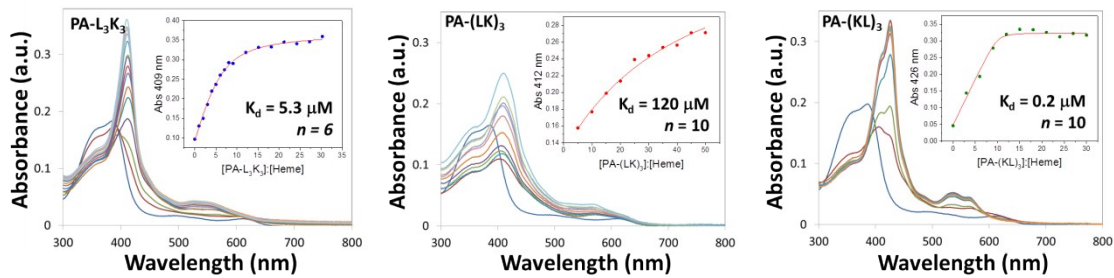

**Figure S8.** UV/visible monitored titrations of (A) PA-L<sub>3</sub>K<sub>3</sub>, (B) PA-(LK)<sub>3</sub> and (C) PA-(KL)<sub>3</sub> where the heme concentration was held at 33 μM and the peptide was varied from 0 to 1 mM in 100 μM increments. The peptide:heme ratio was determined by allowing the ratio ‘n’ to float, equation S1. We then fixed the ratio to the closest integer:  $n = 6$  for PA-L<sub>3</sub>K<sub>3</sub> and  $n = 10$  for PA-(KL)<sub>3</sub> to obtain the final  $K_d$  values. PA-(LK)<sub>3</sub> lacked a clear inflection point and was assumed to have a 10:1 peptide:heme stoichiometry in order to quantitatively compare the binding affinity. The calculated binding constant curves are represented as solid red lines.

$$A = A_o + ((\epsilon_B * l * 0.5) * ((x * M/n + K_d + M) - ((x * M/n + K_d + M)^2 - (4 * x/n * M^2))^{0.5})) - (\epsilon_s * l * M) + ((\epsilon_s * l * 0.5) * (x * M/n + K_d + M) - (((x * M/n + K_d + M))^2 - (4 * x/n * M^2))^{0.5})$$

Same as:

$$A = A_o + \frac{\epsilon_B l}{2} \times \left( \left( \frac{x}{n} \times M + K_D + M \right) - \sqrt{\left( \frac{x}{n} \times M + K_D + M \right)^2 - 4 \times \frac{x}{n} \times M^2} \right) - \epsilon_s \times l$$

**Equation S1.** The equation employed for stoichiometry and binding constant analysis. The top equation can be cut and pasted into origin functions. The bottom equation represents the same equation in a more readable format.  $A_o$ , initial absorption;  $\epsilon_B$ , extinction of bound heme;  $\epsilon_s$ , extinction coefficient contribution from scattering;  $x$ , ratio of peptide to heme;  $n$ , set stoichiometry of peptide to heme;  $K_d$ , dissociation (binding) constant  $M$ , molar concentration of heme;  $l$ , cuvette pathlength.

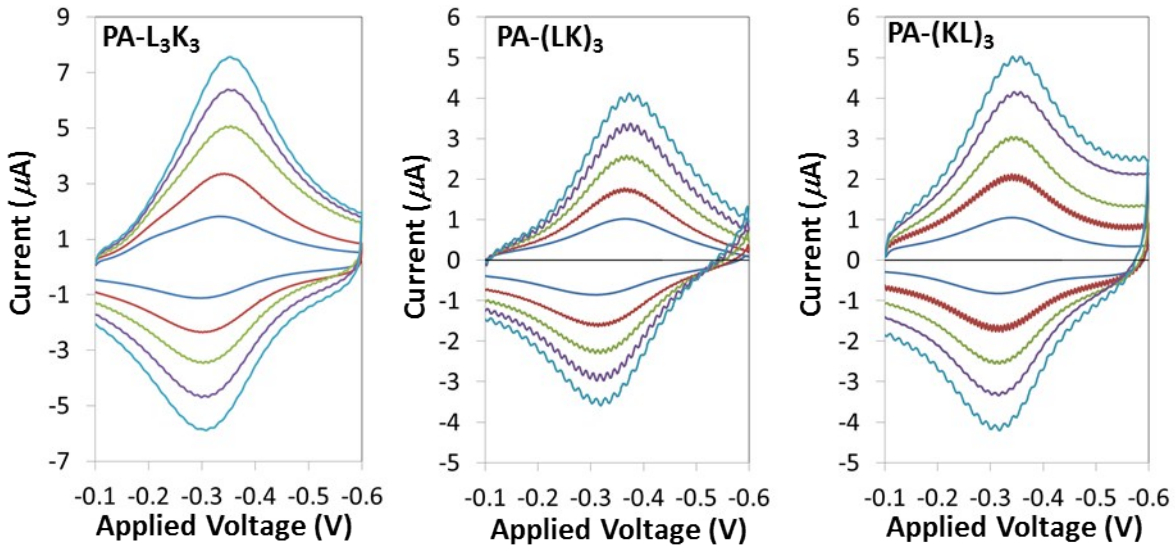

**Figure S9.** Thin film voltammetry results at various scan rates: 200, 400, 600, 800, and 1000 mV/s for (A) PA-L<sub>3</sub>K<sub>3</sub> (B) PA-(LK)<sub>3</sub> and (C) PA-(KL)<sub>3</sub>. The applied voltage is vs. Ag/AgCl reference electrode.
